# Supplementary material
Source: Elsevier journal article supplement (https://www.sciencedirect.com/science/article/pii/S0213911117300584)
Supplement: mmc1 [file S0213911117300584:mmc1.docx]

Tabla Suplementaria 1. Resultados de la valoración de los tres investigadores que llevaron a cabo el estudio de las páginas web. Se destaca en color rojo las discrepancias encontradas.

|  | Indicaciones occidentales | | | | Indicaciones MTC | | | | Usados tradicionalmente | | | | Aviso legal | | | | Precauciones | | | | Alegación de Producto Seguro | | | |
| --- | --- | --- | --- | --- | --- | --- | --- | --- | --- | --- | --- | --- | --- | --- | --- | --- | --- | --- | --- | --- | --- | --- | --- | --- |
| Página | Inv. 1 | Inv. 2 | Inv. 3 | Final | Inv. 1 | Inv. 2 | Inv. 3 | Final | Inv. 1 | Inv. 2 | Inv. 3 | Final | Inv. 1 | Inv. 2 | Inv. 3 | Final | Inv. 1 | Inv. 2 | Inv. 3 | Final | Inv. 1 | Inv. 2 | Inv 3 | Final |
| 1 | SI | SI | SI | SI | SI | NO1 | SI | SI | NO | NO | NO | NO | SI | SI | SI | SI | NO | NO | NO | NO | NO | NO | NO | NO |
| 2 | SI | SI | SI | SI | SI | SI | SI | SI | NO | NO | NO | NO | NO | NO | NO | NO | NO | NO | NO | NO | NO | NO | NO | NO |
| 3 | SI | SI | SI | SI | SI | SI | SI | SI | NO | NO | NO | NO | NO | NO | NO | NO | NO | NO | NO | NO | NO | NO | NO | NO |
| 4 | SI | SI | SI | SI | SI | SI | SI | SI | SI | SI | SI | SI | NO | NO | NO | NO | NO | NO | NO | NO | NO | NO | NO | NO |
| 5 | SI | SI | SI | SI | SI | SI | SI | SI | NO | NO | NO | NO | NO | NO | NO | NO | NO | SI3 | NO | NO6 | NO | NO | NO | NO |
| 6 | SI | SI | NO2 | SI | SI | SI | SI | SI | NO | NO | NO | NO | NO | NO | NO | NO | NO | NO | NO | NO | NO | NO | NO | NO |
| 7 | SI | SI | SI | SI | SI | SI | SI | SI | NO | NO | NO | NO | NO | NO | NO | NO | NO | NO | NO | NO | NO | NO | NO | NO |
| 8 | SI | SI | SI | SI | SI | SI | SI | SI | NO | NO | NO | NO | NO | NO | NO | NO | NO | SI3 | NO | NO6 | NO | NO | NO | NO |
| 9 | SI | SI | SI | SI | SI | SI | SI | SI | NO | NO | NO | NO | NO | NO | NO | NO | SI | SI | SI | SI | NO | NO | NO | NO |
| 10 | SI | SI | SI | SI | SI | SI | SI | SI | SI | SI | SI | SI | NO | NO | NO | NO | NO | NO | NO | NO | SI | SI | SI | SI |
| 11 | SI | SI | SI | SI | NO | NO | SI2 | NO | NO | NO | NO | NO | NO | NO | NO | NO | NO | NO | NO | NO | NO | NO | NO | NO |
| 12 | SI | SI | SI | SI | NO | NO | NO | NO | NO | NO | NO | NO | NO | NO | NO | NO | NO | NO | NO | NO | SI | SI | SI | SI |
| 13 | NO | SI2 | NO | NO | SI | SI | SI | SI | SI | SI | SI | SI | NO | NO | NO | NO | NO | NO | NO | NO | NO | NO | NO | NO |
| 14 | NO | NO | SI2 | NO | SI | SI | SI | SI | SI | SI | SI | SI | NO | NO | NO | NO | NO | NO | NO | NO | NO | NO | NO | NO |
| 15 | NO | NO | NO | SI | SI | SI | SI | SI | SI | SI | SI | SI | NO | NO | NO | NO | NO | NO | NO | NO | NO | NO | NO | NO |
| 16 | SI | SI | SI | SI | SI | SI | SI | SI | SI | SI | SI | SI | SI | SI | SI | SI | NO | NO | NO | NO | NO | NO | NO | NO |
| 17 | SI | SI | SI | SI | SI | SI | SI | SI | SI | NO4 | SI | SI | SI | SI | SI | SI | NO | NO | NO | NO | NO | NO | NO | NO |
| 18 | SI | SI | SI | SI | SI | SI | SI | SI | SI | SI | SI | SI | NO | NO | NO | NO | SI | SI | SI | SI | NO | NO | NO | NO |
| 19 | NO | NO | NO | NO | NO | NO | NO2 | NO | NO | NO | NO | NO | NO | NO | NO | NO | NO | NO | NO | NO | SI | SI | SI | SI |
| 20 | NO | NO | NO | NO | NO | NO | NO | NO | NO | NO | NO | NO | NO | NO | NO | NO | NO | NO | NO | NO | NO | NO | NO | NO |
| 21 | NO | NO | NO | NO | NO | NO | NO | NO | NO | NO | NO | NO | NO | NO | NO | NO | NO | NO | NO | NO | NO | NO | NO | NO |
| 22 | SI | SI | SI | SI | NO | NO | NO | NO | NO | NO | NO | NO | SI | SI | SI | SI | NO | NO | NO | NO | NO | NO | NO | NO |
| 23 | SI | SI | SI | SI | NO | NO | NO | NO | SI | SI | SI | SI | NO | NO | NO | NO | NO | NO | NO | NO | NO | NO | NO | NO |
| 24 | SI | SI | SI | SI | SI | SI | SI | SI | NO | NO | NO | NO | NO | NO | NO | NO | NO | NO | NO | NO | NO | NO | NO | NO |
| 25 | NO | NO | NO | NO | SI | SI | SI | SI | NO2 | NO | NO | NO | NO | NO | NO | NO | NO | NO | NO | NO | NO | NO | NO | NO |
| 26 | NO | NO | NO | NO | SI | SI | SI | SI | SI | SI | SI | SI | NO | NO | NO | NO | NO | NO | NO | NO | NO | NO | NO | NO |
| 27 | NO | NO | NO | NO | NO | NO | NO | NO | NO | NO | NO | NO | NO | NO | NO | NO | NO | NO | NO | NO | NO | NO | NO | NO |
| 28 | SI | SI | SI | SI | SI | SI | SI | SI | SI | SI | SI | SI | NO | SI5 | NO | NO | SI | SI | SI | SI | NO | NO | NO | NO |
| 29 | SI | SI | SI | SI | SI | SI | NO2 | SI | SI | SI | SI | SI | NO | NO | NO | NO | SI | SI | SI | SI | NO | NO | NO | NO |
| 30 | SI | SI | SI | SI | NO | NO | NO | NO | SI | SI | SI | SI | NO | NO | NO | NO | SI | SI | SI | SI | NO | NO | NO | NO |

1. Discrepancia al considerar que el producto no se ofertaba para tratar un síndrome chino, sino para paliar uno de sus signos. Se discutió y tras revisar la definición operativa, si se consideró como una indicación de MTC
2. Problema relacionado con la omisión de lectura.
3. Discrepancia referente a si se considera o no precauciones aquéllas descritas en términos de MTC. Finalmente, se decidió  que las únicas precauciones a considerar son las descritas en términos de medicina alopática.
4. Discrepancia ya que el producto declaraba su utilidad ya que se empleaba en la población china de forma habitual. La discrepancia surgió porque no se empleaba la frase “tradicional”. Tras consultar la definición operativa se decidió considerarlo como uso tradicional
5. En este caso, se planteó la discrepancia porque en la página nº 28 había un aviso legal, pero referido al contenido de la página web y no al producto como en los anteriores casos. Este hecho, unido a que el texto de este aviso legal no indicaba que los productos ofertados no son medicamentos, decidió a los revisores a no considerarlo como aviso legal.
